# Supplementary material
Source: HighWire-hosted journal article supplement (https://bmjopen.bmj.com/content/11/10/e052993)
Supplement: inline-supplementary-material-2 [file inline-supplementary-material-2.pdf]

## Supplementary file 2

### Pre-search in PubMed

**Source:** PubMed (NLM)

**Search date:** 2021-03-11

**Search specifications:** All search terms are searched in the search fields: “title” and “abstract” (here marked with TI/AB) and in MeSH (when available). No filters or limitations applied.

**Result:** 309 records

### Search string

((("Middle East"[Mesh:NoExp] OR "Bahrain"[Mesh] OR "Iraq"[Mesh] OR "Jordan"[Mesh] OR "Kuwait"[Mesh] OR "Lebanon"[Mesh] OR "Oman"[Mesh] OR "Qatar"[Mesh] OR "Saudi Arabia"[Mesh] OR "Syria"[Mesh] OR "United Arab Emirates"[Mesh] OR "Yemen"[Mesh] OR "Arab World"[Mesh] OR "Africa, Northern"[Mesh] OR "Somalia"[Mesh] OR "Djibouti"[Mesh] OR "Comoros"[Mesh] OR "Sudan"[Mesh] OR "Mauritania"[Mesh] OR "Middle East\*"[Title/Abstract] OR "Near East"[Title/Abstract] OR "East Mediterranean" [Title/Abstract] OR "Eastern Mediterranean"[Title/Abstract] OR Arabic[Title/Abstract] OR Arabs[Title/Abstract] OR Arab[Title/Abstract] OR MENA[Title/Abstract] OR "Arabian Peninsula"[Title/Abstract] OR "North Africa" [Title/Abstract] OR "Northern Africa"[Title/Abstract] OR Maghreb[Title/Abstract] OR Maghrib[Title/Abstract] OR Egypt\*[Title/Abstract] OR Jordan\*[Title/Abstract] OR Lebanon[Title/Abstract] OR Lebanese[Title/Abstract] OR Syria\*[Title/Abstract] OR Algeri\*[Title/Abstract] OR Libya\*[Title/Abstract] OR Morocco\*[Title/Abstract] OR Tunis\*[Title/Abstract] OR UAE[Title/Abstract] OR "United Arab Emirates"[Title/Abstract] OR Saudi\*[Title/Abstract] OR KSA[Title/Abstract] OR Qatar\*[Title/Abstract] OR Oman\*[Title/Abstract] OR Emirat\*[Title/Abstract] OR Yemen\*[Title/Abstract] OR Kuwait\*[Title/Abstract] OR Bahrain\*[Title/Abstract] OR Somail\*[Title/Abstract] OR Djibouti\*[Title/Abstract] OR Comoro\*[Title/Abstract] OR Comorian\*[Title/Abstract] OR Iraq\*[Title/Abstract] OR Palestin\*[Title/Abstract] OR “West Bank” [Title/Abstract] OR “Gaza Strip” [Title/Abstract] OR

Sudan\*[Title/Abstract] OR "West Sahara" [Title/Abstract] OR Mauritania\*[Title/Abstract]) AND ("sharp injur\*[Title/Abstract] OR "sharp injur\*[Title/Abstract] OR "sharp instrument injur\*[Title/Abstract] OR "sharp instrument wound\*[Title/Abstract] OR "sharp object injur\*[Title/Abstract] OR "sharp objects injur\*[Title/Abstract] OR "sharp object wound\*[Title/Abstract] OR "sharp objects wound\*[Title/Abstract] OR "Needlestick Injuries"[Mesh] OR "needle stick\*[Title/Abstract] OR needlestick\*[Title/Abstract] OR "needle-stick\*[Title/Abstract] OR "needle wound\*[Title/Abstract] OR "needle Injur\*[Title/Abstract] OR "Wounds, Stab"[Mesh:NoExp] OR "stab-wound\*[Title/Abstract] OR "stab-injur\*[Title/Abstract] OR "stab wound\*[Title/Abstract] OR "stab injur\*[Title/Abstract] OR "stabbing wound\*[Title/Abstract] OR "stabbing injur\*[Title/Abstract] OR "Wounds, Penetrating"[Mesh:NoExp] OR "penetrating wound\*[Title/Abstract] OR "penetrating injur\*[Title/Abstract] OR "penetration wound\*[Title/Abstract] OR "penetration injur\*[Title/Abstract] OR "body fluid exposure\*[Title/Abstract] OR "body fluids exposure\*[Title/Abstract] OR "bodily fluid exposure\*[Title/Abstract] OR "bodily fluid exposure\*[Title/Abstract] OR "biofluid exposure\*[Title/Abstract] OR "biofluids exposure\*[Title/Abstract] OR "splash exposure\*[Title/Abstract] OR "blood exposure\*[Title/Abstract] OR "body fluid splash\*[Title/Abstract] OR "blood splash\*[Title/Abstract])) AND ("Health Personnel"[Mesh] OR "health personnel\*[Title/Abstract] OR "hospital personnel\*[Title/Abstract] OR "health worker\*[Title/Abstract] OR "health care"[Title/Abstract] OR healthcare[Title/Abstract] OR "health-care"[Title/Abstract] OR "medical staff"[Title/Abstract] OR "health occupation\*[Title/Abstract] OR physician\*[Title/Abstract] OR doctor\*[Title/Abstract] OR nurse\*[Title/Abstract] OR nursing[Title/Abstract] OR pharmac\*[Title/Abstract] OR "physical therap\*[Title/Abstract] OR "occupational therap\*[Title/Abstract] OR dental\*[Title/Abstract] OR dentist\*[Title/Abstract] OR "Faculty"[Mesh] OR "medical facult\*[Title/Abstract] OR "health educator\*[Title/Abstract] OR "Students, Health Occupations"[Mesh] OR "medical student\*[Title/Abstract] OR "premedical student\*[Title/Abstract] OR "pre-medical student\*[Title/Abstract] OR "medical graduate\*[Title/Abstract] OR "public health student\*[Title/Abstract] OR "medical intern\*[Title/Abstract] OR "medical residen\*[Title/Abstract] OR anatomist\*[Title/Abstract] OR anesthetist\*[Title/Abstract] OR anesthesiolog\*[Title/Abstract] OR endodontist\*[Title/Abstract] OR orthodontist\*[Title/Abstract] OR epidemiologist\*[Title/Abstract] OR "infection control practitioner\*[Title/Abstract] OR nutritionist\*[Title/Abstract] OR allergist\*[Title/Abstract] OR cardiolog\*[Title/Abstract] OR dermatolog\*[Title/Abstract] OR endocrinolog\*[Title/Abstract] OR gastroenterolog\*[Title/Abstract] OR "general practitioner\*[Title/Abstract] OR geriatric\*[Title/Abstract] OR nephrolog\*[Title/Abstract] OR neurolog\*[Title/Abstract] OR obstetric\*[Title/Abstract] OR oncolog\*[Title/Abstract] OR ophthalmolog\*[Title/Abstract] OR otolaryngolog\*[Title/Abstract] OR patholog\*[Title/Abstract] OR

pediatric\*[Title/Abstract] OR paediatric\*[Title/Abstract] OR neonatal[Title/Abstract] OR  
physiatrist\*[Title/Abstract] OR pulmonolog\*[Title/Abstract] OR radiolog\*[Title/Abstract] OR  
rheumatology\*[Title/Abstract] OR surgeon\*[Title/Abstract] OR midwife\*[Title/Abstract] OR  
urolog\*[Title/Abstract] OR "medical technician\*" OR "sterilisation technician"[Title/Abstract] OR  
"sterilisation assistant"[Title/Abstract] OR "sterilisation staff"[Title/Abstract] OR "sterilization  
technician"[Title/Abstract] OR "sterilization assistant"[Title/Abstract] OR "sterilization  
staff"[Title/Abstract] OR "sterilizing technician"[Title/Abstract] OR "sterilizing  
assistant"[Title/Abstract] OR "sterilizing staff"[Title/Abstract] OR "disinfection  
technician"[Title/Abstract] OR "disinfection assistant"[Title/Abstract] OR "disinfection  
staff"[Title/Abstract] OR "sterilisation personnel"[Title/Abstract] OR "sterilization  
personnel"[Title/Abstract] OR caregiver\*[Title/Abstract] OR "Housekeeping, Hospital"[Mesh] OR  
"Hospitals"[Mesh] OR "Health Facilities"[Mesh:NoExp] OR "Laboratories"[Mesh] OR "Dental  
Facilities"[Mesh] OR hospital[Title/Abstract] OR hospitals[Title/Abstract] OR "medical  
center"[Title/Abstract] OR "care center"[Title/Abstract] OR "medical facility"[Title/Abstract] OR  
"health facilit"[Title/Abstract] OR "medical care facility"[Title/Abstract] OR "medical care  
center"[Title/Abstract] OR "health unit"[Title/Abstract] OR "health center"[Title/Abstract] OR  
"ambulatory care"[Title/Abstract] OR clinic[Title/Abstract] OR clinics[Title/Abstract] OR  
laboratories[Title/Abstract] OR laboratory[Title/Abstract] OR "medical ward"[Title/Abstract] OR  
"critical care unit"[Title/Abstract] OR "intensive care unit"[Title/Abstract] OR "ER"[Title/Abstract] OR  
"emergency center"[Title/Abstract] OR "emergency department"[Title/Abstract] OR "emergency  
unit"[Title/Abstract] OR "delivery room"[Title/Abstract] OR "sterilization room"[Title/Abstract] OR  
"sterilisation room"[Title/Abstract] OR "sterilizing room"[Title/Abstract] OR "sterilising  
room"[Title/Abstract] OR "disinfection room"[Title/Abstract] OR "operation room"[Title/Abstract] OR  
"operating theater"[Title/Abstract] OR "trauma center"[Title/Abstract])
